# Supplementary material
Source: Research Square preprint supplement (doi:10.21203/rs.3.rs-9675356/v1)
Supplement: Supplementary file 1 [file ca388dc6b21e333c5829886c.xlsx]

## Sheet: Country_Raw
Country	Variable	N	Kendall_tau	MK_Z	p_value	Trend	Sen_slope	Annual_percent_change
Indonesia	Emissions_CH4_kt	24	-0.65942	-4.4896	7.13581e-06	Decreasing	-11.8526
Indonesia	Emissions_CO2eq_AR5_kt	24	-0.289855	-1.95955	0.0500487	No significant trend	-172.466
Indonesia	EmissionIntensity_CH4_per_tonne	24	-0.789855	-5.38256	7.34357e-08	Decreasing	-3.61017e-07
Indonesia	EmissionIntensity_CH4_kg_per_kg	24	-0.789855	-5.38256	7.34357e-08	Decreasing	-0.000361017
Indonesia	Production_tonnes	24	0.318841	2.15798	0.0309291	Increasing	154065
Indonesia	AreaHarvested_ha	24	-0.65942	-4.4896	7.13581e-06	Decreasing	-56059.8
Indonesia	GrossProdValue_current_1000USD	24	0.463768	3.15016	0.00163182	Increasing	714580
Indonesia	ProducerPrice_USD_per_t	24	0.471014	3.19977	0.00137538	Increasing	12.0363
Indonesia	FoodCPI_2015_100_annualMean	24	1	6.82121	9.02767e-12	Increasing	5.27041
Philippines	Emissions_CH4_kt	24	0.789855	5.38256	7.34357e-08	Increasing	12.7961
Philippines	Emissions_CO2eq_AR5_kt	24	0.775362	5.28334	1.26851e-07	Increasing	406.927
Philippines	EmissionIntensity_CH4_per_tonne	24	-0.876812	-5.97786	2.26086e-09	Decreasing	-9.8789e-07
Philippines	EmissionIntensity_CH4_kg_per_kg	24	-0.876812	-5.97786	2.26086e-09	Decreasing	-0.00098789
Philippines	Production_tonnes	24	0.884058	6.02747	1.66546e-09	Increasing	327797
Philippines	AreaHarvested_ha	24	0.789855	5.38256	7.34357e-08	Increasing	38246.9
Philippines	GrossProdValue_current_1000USD	24	0.652174	4.43999	8.99638e-06	Increasing	247919
Philippines	ProducerPrice_USD_per_t	24	0.514493	3.49742	0.00046978	Increasing	9.3405
Philippines	FoodCPI_2015_100_annualMean	24	1	6.82121	9.02767e-12	Increasing	3.65633
Viet Nam	Emissions_CH4_kt	24	-0.130435	-0.868154	0.38531	No significant trend	-1.24609
Viet Nam	Emissions_CO2eq_AR5_kt	24	0.224638	1.51307	0.130262	No significant trend	57.1008
Viet Nam	EmissionIntensity_CH4_per_tonne	24	-0.927536	-6.32512	2.53031e-10	Decreasing	-4.7661e-07
Viet Nam	EmissionIntensity_CH4_kg_per_kg	24	-0.927536	-6.32512	2.53031e-10	Decreasing	-0.00047661
Viet Nam	Production_tonnes	24	0.65942	4.4896	7.13581e-06	Increasing	547552
Viet Nam	AreaHarvested_ha	24	-0.130435	-0.868154	0.38531	No significant trend	-7060
Viet Nam	GrossProdValue_current_1000USD	24	0.695652	4.73764	2.1622e-06	Increasing	471305
Viet Nam	ProducerPrice_USD_per_t	24	0.594203	4.04312	5.27451e-05	Increasing	9.40675
Viet Nam	FoodCPI_2015_100_annualMean	24	0.985507	6.72199	1.79254e-11	Increasing	4.8982

## Sheet: Country_Log
Country	Variable	N	Kendall_tau	MK_Z	p_value	Trend	Sen_slope	Annual_percent_change
Indonesia	ln_Emissions_CH4_kt	24	-0.65942	-4.4896	7.13581e-06	Decreasing	-0.00501676	-0.50042
Indonesia	ln_GrossProdValue_current_1000USD	24	0.463768	3.15016	0.00163182	Increasing	0.052752	5.41682
Indonesia	ln_ProducerPrice_USD_per_t	24	0.471014	3.19977	0.00137538	Increasing	0.0500904	5.13661
Indonesia	ln_FoodCPI_2015_100_annualMean	24	1	6.82121	9.02767e-12	Increasing	0.075303	7.82108
Indonesia	ln_Production_tonnes	24	0.318841	2.15798	0.0309291	Increasing	0.0028665	0.287061
Indonesia	ln_AreaHarvested_ha	24	-0.65942	-4.4896	7.13581e-06	Decreasing	-0.00501676	-0.50042
Philippines	ln_Emissions_CH4_kt	24	0.789855	5.38256	7.34357e-08	Increasing	0.00860182	0.863892
Philippines	ln_GrossProdValue_current_1000USD	24	0.652174	4.43999	8.99638e-06	Increasing	0.0570539	5.87129
Philippines	ln_ProducerPrice_USD_per_t	24	0.514493	3.49742	0.00046978	Increasing	0.0371531	3.78519
Philippines	ln_FoodCPI_2015_100_annualMean	24	1	6.82121	9.02767e-12	Increasing	0.0435891	4.45531
Philippines	ln_Production_tonnes	24	0.884058	6.02747	1.66546e-09	Increasing	0.0202181	2.04238
Philippines	ln_AreaHarvested_ha	24	0.789855	5.38256	7.34357e-08	Increasing	0.00860182	0.863892
Viet Nam	ln_Emissions_CH4_kt	24	-0.130435	-0.868154	0.38531	No significant trend	-0.000970589	-0.0970119
Viet Nam	ln_GrossProdValue_current_1000USD	24	0.695652	4.73764	2.1622e-06	Increasing	0.0567077	5.83464
Viet Nam	ln_ProducerPrice_USD_per_t	24	0.594203	4.04312	5.27451e-05	Increasing	0.0426496	4.35722
Viet Nam	ln_FoodCPI_2015_100_annualMean	24	0.985507	6.72199	1.79254e-11	Increasing	0.0790451	8.22531
Viet Nam	ln_Production_tonnes	24	0.65942	4.4896	7.13581e-06	Increasing	0.0138914	1.39883
Viet Nam	ln_AreaHarvested_ha	24	-0.130435	-0.868154	0.38531	No significant trend	-0.000970589	-0.0970118

## Sheet: Pooled_Raw
Country	Variable	N	Kendall_tau	MK_Z	p_value	Trend	Sen_slope	Annual_percent_change
Pooled_mean	Emissions_CH4_kt	24	-0.0144928	-0.0744132	0.940682	No significant trend	-0.132057
Pooled_mean	Emissions_CO2eq_AR5_kt	24	0.347826	2.35642	0.0184521	Increasing	117.768
Pooled_mean	EmissionIntensity_CH4_per_tonne	24	-0.92029	-6.27551	3.48481e-10	Decreasing	-5.76989e-07
Pooled_mean	EmissionIntensity_CH4_kg_per_kg	24	-0.92029	-6.27551	3.48481e-10	Decreasing	-0.000576989
Pooled_mean	Production_tonnes	24	0.637681	4.34077	1.41984e-05	Increasing	342474
Pooled_mean	AreaHarvested_ha	24	-0.130435	-0.868154	0.38531	No significant trend	-10353.1
Pooled_mean	GrossProdValue_current_1000USD	24	0.507246	3.44781	0.000565147	Increasing	471671
Pooled_mean	ProducerPrice_USD_per_t	24	0.507246	3.44781	0.000565147	Increasing	10.348
Pooled_mean	FoodCPI_2015_100_annualMean	24	1	6.82121	9.02767e-12	Increasing	4.63048

## Sheet: Pooled_Log
Country	Variable	N	Kendall_tau	MK_Z	p_value	Trend	Sen_slope	Annual_percent_change
Pooled_mean	ln_Emissions_CH4_kt	24	0.166667	1.1162	0.264337	No significant trend	0.000764776	0.0765069
Pooled_mean	ln_GrossProdValue_current_1000USD	24	0.543478	3.69586	0.000219147	Increasing	0.0574467	5.91288
Pooled_mean	ln_ProducerPrice_USD_per_t	24	0.5	3.3982	0.0006783	Increasing	0.0460591	4.71363
Pooled_mean	ln_FoodCPI_2015_100_annualMean	24	1	6.82121	9.02767e-12	Increasing	0.0650349	6.71963
Pooled_mean	ln_Production_tonnes	24	0.695652	4.73764	2.1622e-06	Increasing	0.0124024	1.24796
Pooled_mean	ln_AreaHarvested_ha	24	0.166667	1.1162	0.264337	No significant trend	0.000764777	0.0765069
